# Supplementary material
Source: publisher figshare collection journal article supplement (https://acs.figshare.com/ndownloader/files/14284646)
Supplement: Supplementary file 1 [file 14284646]

## Supplementary Information for

### **Nanostructural Properties and Twist Periodicity of Cellulose Nanofibrils with Variable Charge Density**

*Mario Arcari<sup>1</sup>, Elena Zuccarella<sup>1</sup>, Robert Axelrod<sup>1</sup>, Jozef Adamcik<sup>1</sup>, Antoni Sánchez-Ferrer<sup>1</sup>,  
Raffaele Mezzenga<sup>1,2\*</sup> and Gustav Nyström<sup>1,3\*</sup>*

1. ETH Zurich, Department of Health Science and Technology, Schmelzbergstrasse 9, LFO E23, 8092 Zurich, Switzerland.
2. ETH Zurich, Department of Materials, Wolfgang-Pauli-Strasse 10, 8093 Zurich, Switzerland.
3. EMPA, Laboratory for Cellulose & Wood Materials, Überlandstrasse 129, 8600 Dübendorf, Switzerland.

\*Correspondence to: raffaele.mezzenga@hest.ethz.ch, gustav.nystroem@empa.ch

### **Supplementary text**

#### **Fibril characterization using AFM**

To make sure that we were able to compare the AFM images with as little bias as possible, we only tracked single fibrils without splitting events or thick segments where two or more fibrils overlay. The concentration for the different fibril dispersions used to adsorb the fibrils onto mica was adjusted to guarantee the least possible overlapping. The adsorption on the mica depends on the charge density as well as the sonication time and could be seen as a qualitative measurement for the effectiveness of the fibrillization. Depending on the sonication time, the number of larger particles (agglomerates and fibrils that split) not taken into account were around 50% for 5 min of sonication. This value declined to around 25% for 17 min of sonication. However, the variation between the data of a completely tracked image (100% of the fibrils) and the data we presented in the paper is lower than 3%.

#### **Crystallinity due to WAXS**

As an average of all measured samples, we got around 69% crystallinity before sonication (including pulp with and without TEMPO-mediated oxidation) and 58% crystallinity after the sonication treatment for bleached pulps (Table S2). For the unbleached samples, we did less measurements and a difference before and after sonication is less distinctive, 68% before and 64% after sonication.

## Supplementary figures

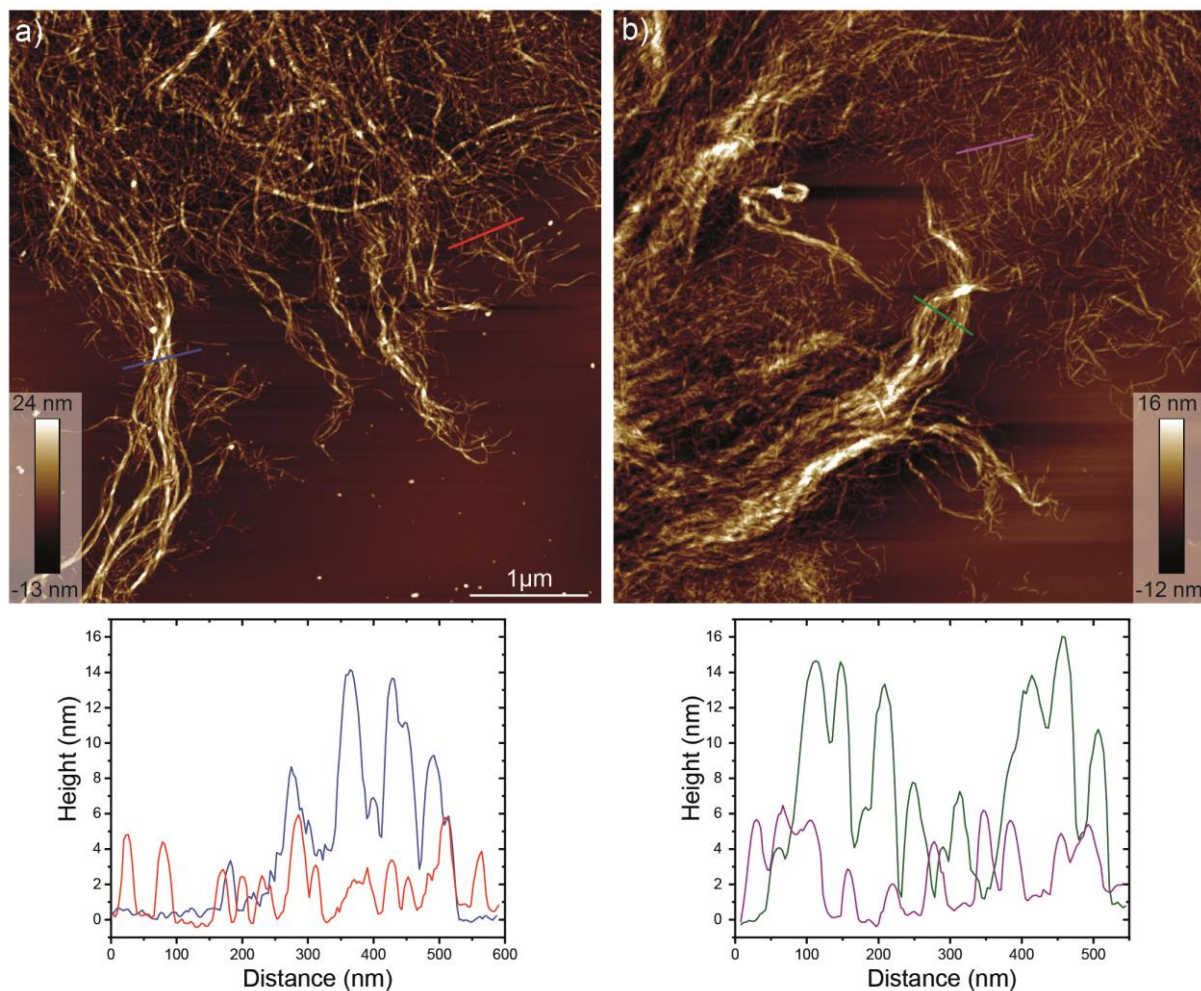

**Figure S1.** AFM images of TEMPO-mediated oxidized a) unbleached and b) bleached paper pulp without sonication treatment and the corresponding height profiles along the colored lines at the bottom of each image.

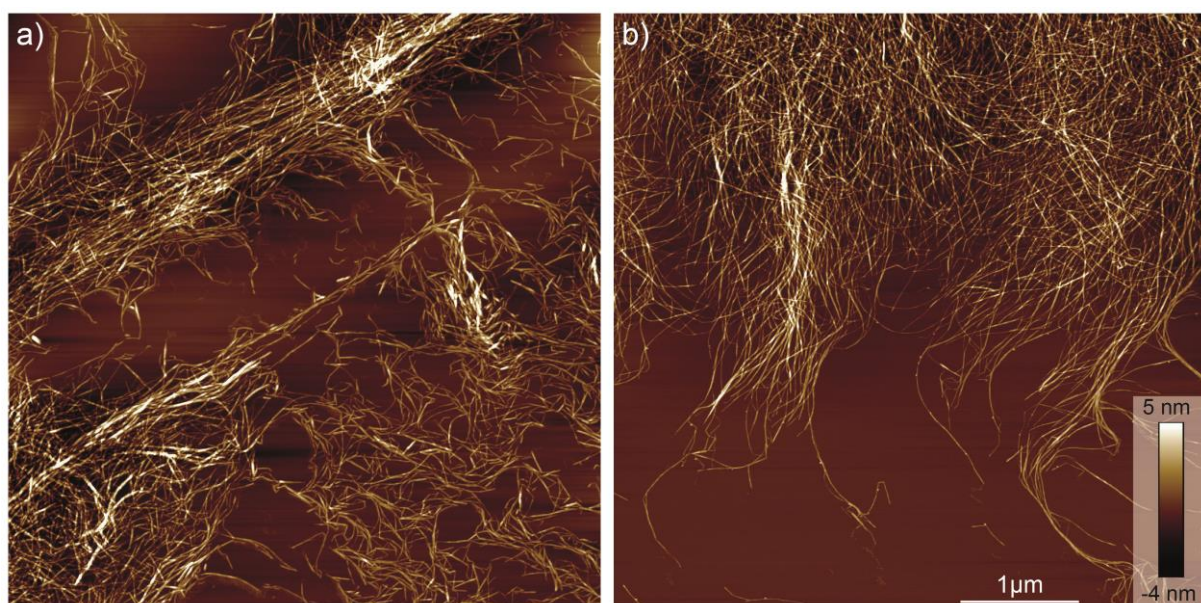

**Figure S2.** AFM images of the pellet from the centrifugation after sonication treatment of a) unbleached and b) bleached TEMPO-mediated oxidized pulp.

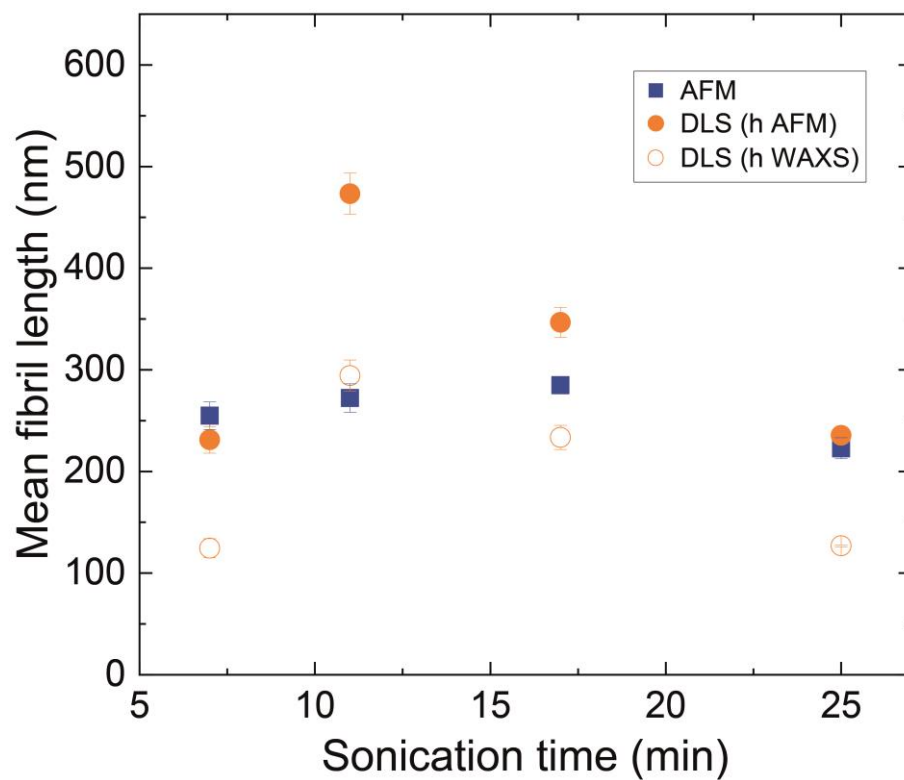

**Figure S3.** Comparison of mean fibril length between DLS (orange circle) and AFM (blue square) measurements of CNF dispersions prepared from bleached wood pulp with a charge density of 830  $\mu\text{mol/g}$  CNF (standard deviation of DLS of 3 measurements and standard error of AFM  $n > 200$ ). For DLS the height  $h$  is taken from either AFM ( $h \approx 2$  nm, full circle) and WAXS ( $h \approx 4$  nm, empty circle), respectively.

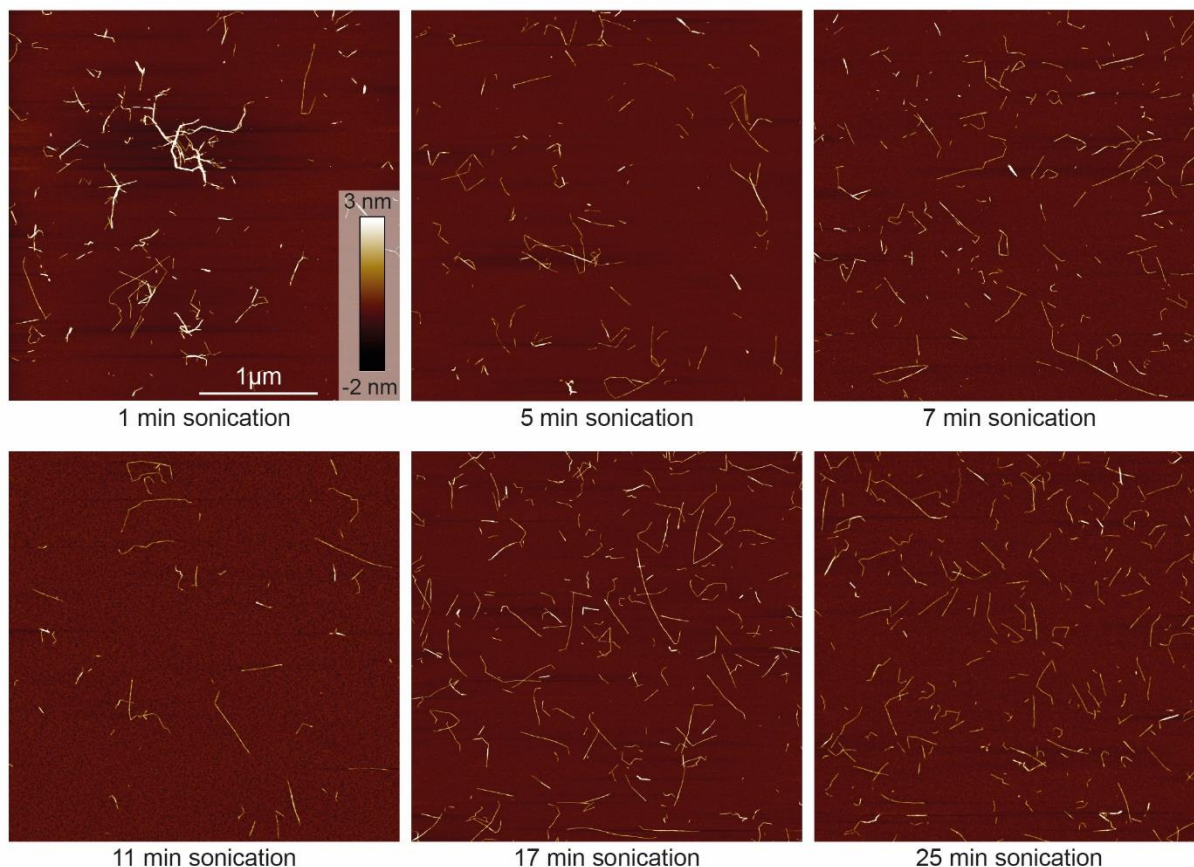

**Figure S4.** Representative AFM images showing the influence of increasing sonication time on the fibrillation of CNFs from bleached paper pulp with a charge density of  $830 \mu\text{mol/g}$ .

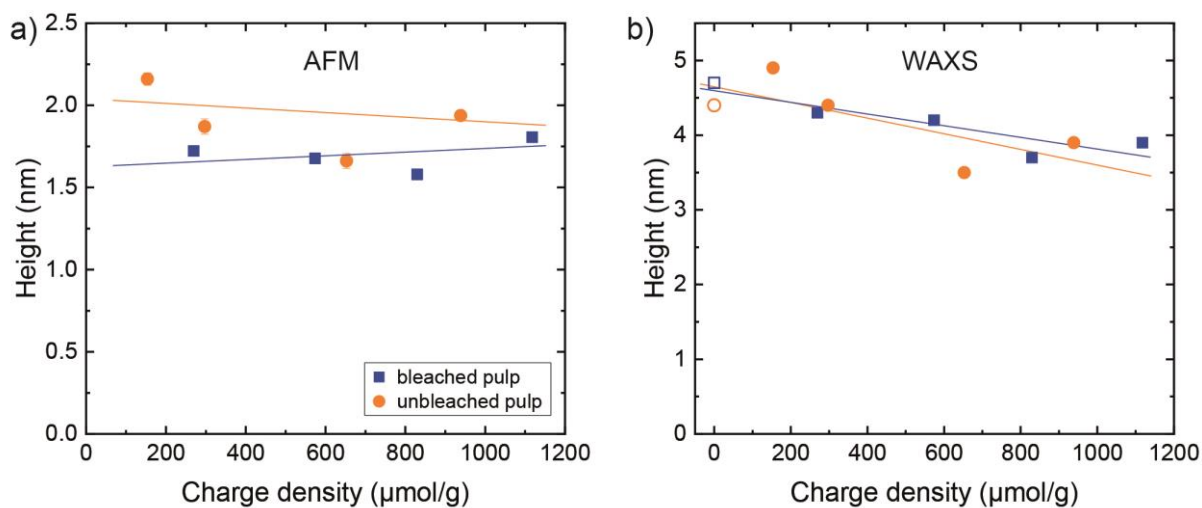

**Figure S5.** Average fibril height determined by a) AFM and b) WAXS as function of charge density. As zero charge density, WAXS measurements were done with unoxidized and unsonicated pulp (empty points), whereas the other points were done with lyophilized samples from sonicated fibril dispersions.

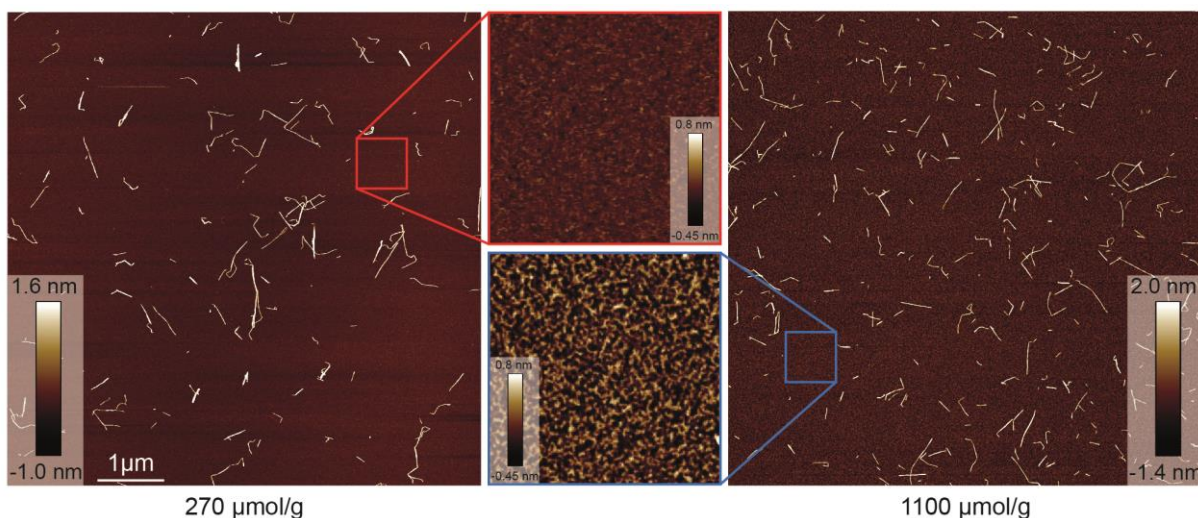

**Figure S6.** AFM images showing the difference in roughness of the APTES-modified mica surface while adsorbing CNF dispersions with low and high charge density. The roughness is coming from negatively charged single cellulose polymer chains. This change in roughness influences the determination of the zero-level to measure the height with FiberApp.

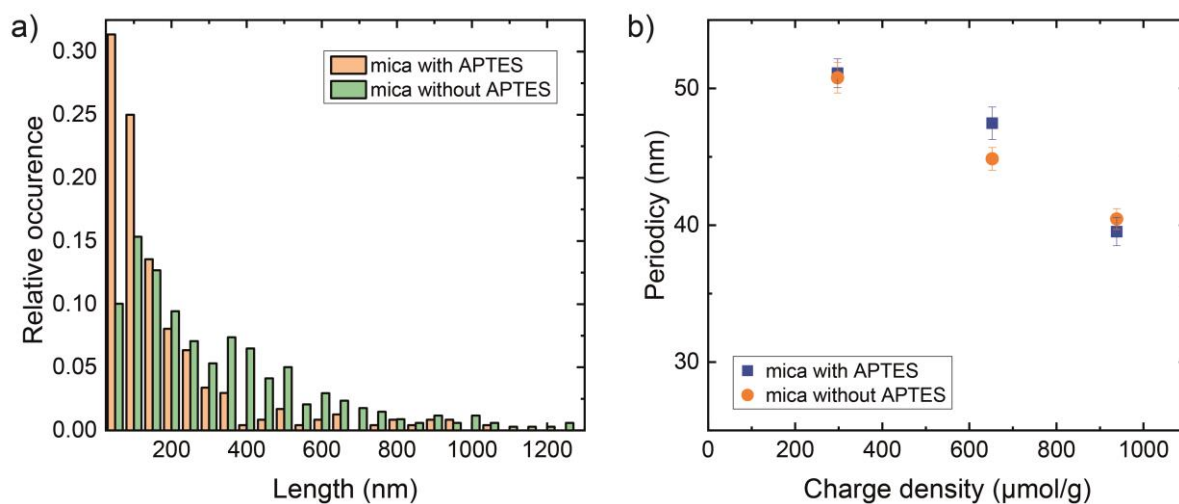

**Figure S7.** a) Histogram of length distribution of tracked fibrils on APTES-modified (orange) and unmodified (green) mica (CNF after 11 min sonication from the unbleached pulp treated with 10 mmol NaClO per gram cellulose). b) Comparison of twist periodicity of different charge density on APTES-modified (blue) and unmodified (orange) mica.

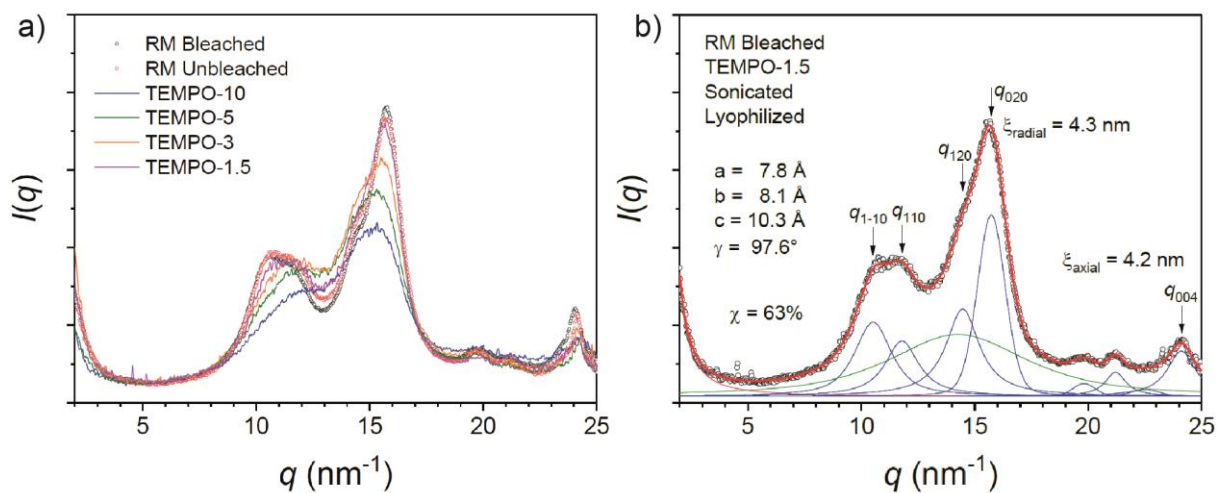

**Figure S8.** a) WAXS intensity profile of lyophilized bleached and unbleached industrial pulp and four bleached TEMPO-mediated oxidized samples (sonicated and lyophilized). b) Deconvolution of the WAXS profile of bleached CNF after sonication and lyophilization.

## Supplementary table

**Table S1.** Parameters obtained from AFM image analysis and DLS for all different CNF samples.

| Sample name* | Mean length (nm) | stdD | stdE | Length weighted length (nm) | stdD | stdE | Mean length (nm, DLS) | Inverse kink density | Average segment length (nm) | Number of kinks per fibril | Charge density ( $\mu\text{mol/g}$ ) |
|--------------|------------------|------|------|-----------------------------|------|------|-----------------------|----------------------|-----------------------------|----------------------------|--------------------------------------|
| 1.5bl 05min  | 281              | 336  | 27   | 680                         | 523  | 43   |                       | 180                  | 110                         | 1.56                       | 270                                  |
| 1.5bl 07min  | 332              | 336  | 23   | 671                         | 478  | 33   |                       | 177                  | 116                         | 1.87                       | 270                                  |
| 1.5bl 11min  | 342              | 293  | 20   | 592                         | 386  | 27   |                       | 181                  | 118                         | 1.89                       | 270                                  |
| 1.5bl 17min  | 313              | 279  | 27   | 560                         | 374  | 36   |                       | 183                  | 116                         | 1.71                       | 270                                  |
| 1.5bl 25min  | 323              | 258  | 18   | 528                         | 330  | 23   |                       | 191                  | 120                         | 1.69                       | 270                                  |
| 3bl 05min    | 352              | 359  | 31   | 715                         | 511  | 44   |                       | 228                  | 138                         | 1.54                       | 570                                  |
| 3bl 07min    | 265              | 309  | 22   | 623                         | 473  | 34   | 548                   | 247                  | 128                         | 1.07                       | 570                                  |
| 3bl 11min    | 292              | 283  | 11   | 567                         | 395  | 15   | 422                   | 239                  | 132                         | 1.22                       | 570                                  |
| 3bl 17min    | 300              | 275  | 16   | 551                         | 373  | 21   | 325                   | 248                  | 136                         | 1.21                       | 570                                  |
| 3bl 25min    | 327              | 266  | 10   | 544                         | 343  | 13   | 329                   | 234                  | 136                         | 1.40                       | 570                                  |
| 5bl 05min    | 212              | 216  | 16   | 431                         | 308  | 23   |                       | 282                  | 121                         | 0.75                       | 830                                  |
| 5bl 07min    | 255              | 248  | 14   | 496                         | 346  | 19   | 231                   | 231                  | 121                         | 1.10                       | 830                                  |
| 5bl 11min    | 272              | 242  | 14   | 486                         | 323  | 19   | 473                   | 257                  | 132                         | 1.06                       | 830                                  |
| 5bl 17min    | 285              | 233  | 7    | 476                         | 301  | 9    | 347                   | 286                  | 143                         | 1.00                       | 830                                  |
| 5bl 25min    | 223              | 183  | 10   | 373                         | 237  | 13   | 236                   | 223                  | 111                         | 1.00                       | 830                                  |
| 10bl 05min   | 234              | 191  | 18   | 388                         | 245  | 23   |                       | 254                  | 122                         | 0.92                       | 1100                                 |
| 10bl 07min   | 205              | 168  | 9    | 342                         | 217  | 12   | 343                   | 321                  | 125                         | 0.64                       | 1100                                 |
| 10bl 11min   | 204              | 166  | 8    | 339                         | 214  | 10   | 403                   | 340                  | 127                         | 0.60                       | 1100                                 |
| 10bl 17min   | 185              | 160  | 6    | 323                         | 212  | 8    | 338                   | 349                  | 121                         | 0.53                       | 1100                                 |
| 10bl 25min   | 199              | 145  | 6    | 304                         | 180  | 8    | 189                   | 343                  | 126                         | 0.58                       | 1100                                 |
| 1.5ubl 05min | 518              | 550  | 47   | 1098                        | 800  | 69   |                       | 193                  | 141                         | 2.69                       | 150                                  |
| 1.5ubl 07min | 493              | 441  | 30   | 885                         | 590  | 40   |                       | 207                  | 146                         | 2.38                       | 150                                  |
| 1.5ubl 11min | 468              | 380  | 32   | 774                         | 489  | 41   |                       | 216                  | 148                         | 2.17                       | 150                                  |
| 1.5ubl 17min | 447              | 367  | 30   | 746                         | 474  | 39   |                       | 208                  | 142                         | 2.15                       | 150                                  |
| 1.5ubl 25min | 390              | 303  | 22   | 624                         | 383  | 28   |                       | 177                  | 122                         | 2.21                       | 150                                  |
| 3ubl 05min   | 553              | 554  | 60   | 1101                        | 782  | 84   |                       | 292                  | 191                         | 1.90                       | 230                                  |
| 3ubl 07min   | 547              | 480  | 27   | 966                         | 637  | 36   | 375                   | 325                  | 204                         | 1.68                       | 230                                  |
| 3ubl 11min   | 454              | 408  | 23   | 819                         | 548  | 31   | 340                   | 253                  | 163                         | 1.79                       | 230                                  |
| 3ubl 17min   | 439              | 354  | 25   | 723                         | 454  | 33   | 346                   | 277                  | 170                         | 1.58                       | 230                                  |
| 3ubl 25min   | 385              | 263  | 15   | 564                         | 318  | 18   | 259                   | 236                  | 146                         | 1.63                       | 230                                  |
| 5ubl 04min   | 552              | 638  | 50   | 1285                        | 974  | 77   |                       | 396                  | 231                         | 1.39                       | 650                                  |
| 5ubl 05min   | 482              | 462  | 29   | 922                         | 639  | 41   |                       | 389                  | 215                         | 1.24                       | 650                                  |
| 5ubl 07min   | 493              | 469  | 38   | 935                         | 645  | 52   | 338                   | 356                  | 207                         | 1.38                       | 650                                  |
| 5ubl 11min   | 459              | 381  | 24   | 774                         | 495  | 31   | 383                   | 303                  | 183                         | 1.51                       | 650                                  |
| 5ubl 17min   | 400              | 339  | 22   | 686                         | 444  | 28   | 332                   | 321                  | 178                         | 1.25                       | 650                                  |
| 5ubl 25min   | 335              | 255  | 13   | 529                         | 321  | 16   | 215                   | 320                  | 164                         | 1.05                       | 650                                  |
| 10ubl 05min  | 329              | 315  | 26   | 628                         | 435  | 36   |                       | 323                  | 163                         | 1.02                       | 940                                  |
| 10ubl 07min  | 294              | 230  | 14   | 473                         | 292  | 18   | 456                   | 436                  | 176                         | 0.67                       | 940                                  |
| 10ubl 11min  | 268              | 261  | 17   | 520                         | 363  | 24   | 459                   | 411                  | 162                         | 0.65                       | 940                                  |
| 10ubl 17min  | 288              | 219  | 10   | 453                         | 274  | 13   | 412                   | 523                  | 186                         | 0.55                       | 940                                  |
| 10ubl 25min  | 264              | 193  | 9    | 405                         | 239  | 11   | 253                   | 477                  | 170                         | 0.55                       | 940                                  |

\*The sample name is a compound from: amount of NaClO [mmol/g cellulose]; bleached (bl) or unbleached (ubl); sonication time, e.g. 3 bl 11min = 3 mmol NaClO per g cellulose, bleached pulp, 11 min sonication.

**Table S2.** Crystallinity data from WAXS deconvolution for different pulps and dispersions.

| NaOH<br>(mmol/g) | Crystallinity (%) |             |             |             |             |
|------------------|-------------------|-------------|-------------|-------------|-------------|
|                  | bleached          |             |             | unbleached  |             |
|                  | sonicated         | unsonicated |             | sonicate    | unsonicated |
|                  | lyophilized       | evaporated  | lyophilized | lyophilized | lyophilized |
| <b>0</b>         |                   |             | 66          |             | 68          |
| <b>1.5</b>       | 63                |             |             | 64          |             |
| <b>3</b>         | 58                | 69          | 72          | 63          |             |
| <b>5</b>         | 62                | 66          | 65          | 67          |             |
| <b>10</b>        | 50                | 75          | 67          | 60          |             |
| <b>Average</b>   | 58                |             | 69          | 64          | 68          |

**Table S3.** Yield after sonication and centrifugation.

| Sample name*    | Yield (%) |
|-----------------|-----------|
| 10 bl, 11 min   | 0.86      |
| 10 ubl, 11 min  | 0.89      |
| 5 bl, 11 min    | 0.85      |
| 5 ubl, 11 min   | 0.84      |
| 3 bl, 11 min    | 0.35      |
| 3 ubl, 11 min   | 0.31      |
| 1.5 bl, 11 min  | 0.24      |
| 1.5 ubl, 11 min | -         |

\*The sample name is a compound from: amount of NaClO [mmol/g cellulose]; bleached (bl) or unbleached (ubl); sonication time, e.g. 3 bl 11 min = 3 mmol NaClO per g cellulose, bleached pulp, 11 min sonication.



## Supplementary material and methods

### **Materials and chemicals**

If not stated otherwise, the chemicals were obtained by Sigma Aldrich and used without further purification. Bleached and unbleached never-dried sulphite softwood-dissolving pulp was obtained by Domsjö, Sweden. The degree of polymerization (DP) of both pulps was around 770, determined by Domsjö.

### **Instrument list**

|                  |                                                                                                |
|------------------|------------------------------------------------------------------------------------------------|
| Ultra-sonicater: | Hielscher UP200S                                                                               |
| DLS:             | Zetasizer Nano ZS, Malvern Instruments Ltd. U.K.                                               |
| Centrifuge:      | Centrifuge 5810 R, Eppendorf<br>Prism Microcentrifuge, Labnet<br>Sigma 3K3OH, Sigma            |
| Charge density:  | Conductivity meter EL30/EL3, Mettler Toledo                                                    |
| AFM:             | MultiMode VIII Scanning Probe Microscope, Bruker, USA                                          |
| WAXS:            | Rigaku MicroMax-002 <sup>+</sup> , Rigaku Innovative Technologies, Auburn Hills, Michigan, USA |
